# Supplementary material for: Heme ligation and redox chemistry in two bacterial thiosulfate dehydrogenase (TsdA) enzymes
Source: PubMed Central journal article supplement (PMC6879331; doi:10.1074/jbc.ra119.010084), 2019-08-29
Supplement: supp_RA119.010084_153928_1_supp_384534_pwsbn7.pdf [file supp_RA119.010084_153928_1_supp_384534_pwsbn7.pdf]

# SUPPORTING INFORMATION

|                                    |                                                               |     |
|------------------------------------|---------------------------------------------------------------|-----|
| <i>Parachlamydia acanthamoebae</i> | -----                                                         | 0   |
| <i>Campylobacter jejuni</i>        | -----LDPNL-----                                               | 5   |
| <i>Wolinella succinogenes</i>      | -----FERWT-----                                               | 5   |
| <i>Marichromatium purpuratum</i>   | PACVRCRCHGPGVGAGAVFPPLAGQPYSYLLAQLQAWGTGRRHGPEMALMGAVAGRLDADE | 180 |
| <i>Thiomonas intermedia</i>        | -----                                                         | 0   |
| <i>Sideroxydans lithotrophicus</i> | -----                                                         | 0   |
| <i>Pseudomonas stutzeri</i>        | -----                                                         | 0   |
| <i>Allochromatium vinosum</i>      | -----                                                         | 0   |
| <i>Psychrobacter arcticus</i>      | -----SDNTE                                                    | 5   |
|                                    |                                                               |     |
| <i>Parachlamydia acanthamoebae</i> | -----SSN-----                                                 | 3   |
| <i>Campylobacter jejuni</i>        | -----EK-----TKSATGIDLPTAKWNLPKALNED-----                      | 30  |
| <i>Wolinella succinogenes</i>      | -----LE-----ARGKSGYDAPKLEWVEGKTIINEIKNPTI                     | 35  |
| <i>Marichromatium purpuratum</i>   | QRALAAFYATRPLAVADPADDLPDPSPPPATASVSTPAMTVAGANAVVPEHLGAV-----  | 235 |
| <i>Thiomonas intermedia</i>        | -----ADAPMAP-PKSEI-----                                       | 12  |
| <i>Sideroxydans lithotrophicus</i> | -----ASET-----                                                | 4   |
| <i>Pseudomonas stutzeri</i>        | -----AEIKMDDQSQLTQ-----                                       | 13  |
| <i>Allochromatium vinosum</i>      | -----                                                         | 0   |
| <i>Psychrobacter arcticus</i>      | TKAVERVEEAAAALA---RVKDLEA-----RAEALKS---NMPAANDMTA---TAG----- | 46  |
|                                    |                                                               |     |
| <i>Parachlamydia acanthamoebae</i> | --GMSSNDTQEWRTTLLDPEMAPENIKPLVMQGFRIFLDTKK-----HAPQYAGDE      | 53  |
| <i>Campylobacter jejuni</i>        | -----GTIDETKMPKNSYKMLVILGNKILNETSKYVGPQAKDPKKRFAGNN           | 77  |
| <i>Wolinella succinogenes</i>      | QYALPKFEGDVFWDITINAKPVVDSIYGEFVQVGYELFVNTQAVIIGEVADPNMRYSGNN  | 95  |
| <i>Marichromatium purpuratum</i>   | ---PAGRAEAAAS-RFTPPSRDALPEGLGEMVRLGARLFRHTNTD-----PRSAPHVGN   | 286 |
| <i>Thiomonas intermedia</i>        | ---NA-AVGTGA-KFTPPPESAIPDDDFGKMKVLRGRDIMLDTPK-----YAKDYVGN    | 60  |
| <i>Sideroxydans lithotrophicus</i> | ---STPTAAKAL-VFTPPNDEEIPNNEFGKIVRQGNIFEDTQH-----YAKQYVGN      | 53  |
| <i>Pseudomonas stutzeri</i>        | ---KAGKGAGES-YFQPPQEKDLPANAYGELVQQGRAIFVDTQK-----YAAEYVGN     | 62  |
| <i>Allochromatium vinosum</i>      | ---EPPPTV-ALTVPAAALLPDGALGESIVRGRRLSDTPA-----QLPDPVGN         | 46  |
| <i>Psychrobacter arcticus</i>      | --GTDASGKP-TIKMPDESTIPDDEFGAARRLQISNHTYK-----ELPNNVGNQ        | 95  |
|                                    |                                                               |     |
| <i>Parachlamydia acanthamoebae</i> | ISCTNCHFCNGNTFGGENNGISLVGVTKKYPRAILD-NPHYTLEERINACFTKSLNG---  | 109 |
| <i>Campylobacter jejuni</i>        | LSCSSCHANGG----SVQNSQGFVGIWARFPQYNARGDKVITLADRINGCFERSMNG---  | 130 |
| <i>Wolinella succinogenes</i>      | LSCNSCHLGGAG---TAKYAAPLVDNHNANFPQYRNRENSLGTMAARVNGCMQSRMNG--- | 148 |
| <i>Marichromatium purpuratum</i>   | QTCAGCHLDNG----RRADASPMWAAWVYAPYRGNQVDTMAERIQCFFRYSMNAQDS     | 342 |
| <i>Thiomonas intermedia</i>        | LSCVNCHTDAG----RMAGSAPLWAAVYVYAPYRGNKKNVNTFEERLQCFKFSQNG---   | 113 |
| <i>Sideroxydans lithotrophicus</i> | LNCVNCHLAGS----RKENSPLWAAVYVYAPYRGNKKNVNTYEERIQCFFKYSLNG---   | 106 |
| <i>Pseudomonas stutzeri</i>        | MNCINCHLEQG----RKANSAPLWAGYPMYPAYRKKNDKVNYSYAEERVQCFQFSMNG--- | 115 |
| <i>Allochromatium vinosum</i>      | LACRCHHPGRDGEVGTAEANAAPPVGVGRFPQYSARHGRLITLEQRIGDCEPERSLNG--- | 103 |
| <i>Psychrobacter arcticus</i>      | LNCSTCHLNG----SEAYAAPWNNTSPVYPNYSKRTGRINTIQRINGCFERSLNG---    | 148 |
|                                    |                                                               |     |
| <i>Parachlamydia acanthamoebae</i> | ---KPVPLKSKEMKAMIAYLEWISKGVSNQA---PWLGLKLLRS---HAIPNAEKGAL    | 159 |
| <i>Campylobacter jejuni</i>        | ---KRMPDTPKEMKAMLYMQWLSQGVVPGA-KIEGQGLKKIDF---ISRAADPKKGA     | 183 |
| <i>Wolinella succinogenes</i>      | ---YPLPAEGKEMKAFLAYIHWLGGQIPVGA-KIEGRSLKTVDKRMVQQAADVKNGAEV   | 204 |
| <i>Marichromatium purpuratum</i>   | VSGQVPETNGLVLDALQSYIFWLATGAPTGDATMSGRGYPRLQP---PAEGFDRTRGAAL  | 399 |
| <i>Thiomonas intermedia</i>        | ---KAPPLGSKTLVALESYSYWSLKGFLVDE-KVAGRGYVNLPE---PQQAPDVVRGQKV  | 166 |
| <i>Sideroxydans lithotrophicus</i> | ---KAPAVDSPEMVALVTYSYWLATGAFVGA-KLKGAGYPEVPK---PGLIPDANRGKTV  | 159 |
| <i>Pseudomonas stutzeri</i>        | ---TPPAADSHVINALTAYSYWLSTGAPTQ-ELPGRAYPEVPQ---PQGGFDIAKGGKI   | 168 |
| <i>Allochromatium vinosum</i>      | ---RALALDHPALIDMLAYMSWLSQGVVPGA-VVAGHGIPTLTL---E-REPDCVHGAL   | 155 |
| <i>Psychrobacter arcticus</i>      | ---KALDLNSDDMNAMVSYMSWLSQDMFVGV-SPEGSGFVKVDK---T-LEPNTDNGKGL  | 200 |
|                                    |                                                               |     |
| <i>Parachlamydia acanthamoebae</i> | YQCHCAACHGKDGEGQLRPD-----NLKYPPLWGN-HSFNQAGMNDLPTLAAFIYDNM    | 212 |
| <i>Campylobacter jejuni</i>        | YMDKCAVCHQENGLGLKNEDSA--GAYLYPPLWGD-DSYNTGAGMYRLIKAASYIKENM   | 240 |
| <i>Wolinella succinogenes</i>      | YARDCAACHGAEGLRRESKDGKPGAYEFPPLWGSDDTYNTGAGMYRTLKAAADFIKSTM   | 264 |
| <i>Marichromatium purpuratum</i>   | YAEHCALCHGAEGEGLL-VD----GEVVFPLWGP-RSYNWGAGMHRVDTAAAFIAANM    | 452 |
| <i>Thiomonas intermedia</i>        | YEAKCILCHAANGEGQY-VN----GETVFPPPLWGP-KSFNWGAGMGSYKNAAKFIYANM  | 219 |
| <i>Sideroxydans lithotrophicus</i> | FVENQCQVCHGSGNEGK-VD----GKYIFPPLWGS-ESFNWAGMHRINTAAAFIKANM    | 212 |
| <i>Pseudomonas stutzeri</i>        | YAEQCQVCHGDDGGQK-AG----GGYVFPLWGP-DSFNWAGMHRINTAAAFIKESM      | 221 |
| <i>Allochromatium vinosum</i>      | YQARCLACHGADGSGTLDAD----GRYLFPPPLWGP-RSFNTGAGMNRQATAAGFIKHKM  | 209 |
| <i>Psychrobacter arcticus</i>      | FAEKCSVCHGATGEGQYND-----GTYYVPAIAGD-KSFNDGAGMARTYTAASFIKKGM   | 254 |
|                                    |                                                               |     |
| <i>Parachlamydia acanthamoebae</i> | PYQEP-RLTVEEVLDAAYITSQ--PRPIEIRTP-----                        | 243 |
| <i>Campylobacter jejuni</i>        | PQGAP-DLSLEDAYDVAAYMNSQ--ARP IKANRDKDFPDRKVK---PLDMD---VGPYDD | 291 |
| <i>Wolinella succinogenes</i>      | PKGAP-TLSDKDAYDVAAYINDYSHYRTVKLNQRQDFVDPKVR---VPDHDQ--PGYPG   | 318 |
| <i>Marichromatium purpuratum</i>   | PLLDTVRLTPQEAWDVAAYINAH--ERPQDPRF---DG-SVERTAARFHASP-FDLYGE   | 504 |
| <i>Thiomonas intermedia</i>        | PYGMYSLSPEAWDVAAYFMDAQ--ERPQDPRW---QG-SVAATRKFHDSK-FSLYGT     | 271 |
| <i>Sideroxydans lithotrophicus</i> | PLSKGGLTLDQEAWDVATFVMSH--ERPQDPRF---KG-NVAQTKKEYHDE--NCRYGE   | 263 |
| <i>Pseudomonas stutzeri</i>        | PLGKGSLSLSDADAWHVAAYMNSH--ERPQDPRL---IEGSVEKTRLYHANDGVNLYGQ   | 275 |
| <i>Allochromatium vinosum</i>      | PLGADDSLSDEAWDVAGFVLTH--PRLFPQEPDGD-----                      | 243 |
| <i>Psychrobacter arcticus</i>      | PFGQGGSLSDQEAVDIASYFHTL--PRPIKANKDKDWPNGDAPKDVRR-----         | 300 |
|                                    |                                                               |     |
| <i>Parachlamydia acanthamoebae</i> | -----                                                         | 243 |
| <i>Campylobacter jejuni</i>        | S-----FSTTQHRYGPTYNMIKK-----                                  | 309 |
| <i>Wolinella succinogenes</i>      | EGSYIFPDEGKTQMDYKVGPKYKGIKQKPAK--                             | 350 |
| <i>Marichromatium purpuratum</i>   | P-----LGVDGAVLGGQVAKD--                                       | 520 |
| <i>Thiomonas intermedia</i>        | K-----VNGKLLGDI GAPKPR                                        | 287 |
| <i>Sideroxydans lithotrophicus</i> | T-----VNGKVLGGKHQTAAK                                         | 279 |
| <i>Pseudomonas stutzeri</i>        | Q-----VDGALLGGQVK--                                           | 287 |
| <i>Allochromatium vinosum</i>      | -----                                                         | 243 |
| <i>Psychrobacter arcticus</i>      | -----                                                         | 300 |

**Figure S1.** Sequence alignment for TsdAs from *Parachlamydia acanthamoebae*, *Campylobacter jejuni*, *Wolinella succinogenes*, *Allochromatium vinosum*, *Marichromatium purpuratum*, *Thiomonas intermedia*, *Sideroxydans lithotrophicus* and *Pseudomonas stutzeri*. Heme binding motifs including proximal His ligand are indicated in blue with the distal Cys ligand to Heme 1 in red and M(K) ligand to Heme 2 in brown.

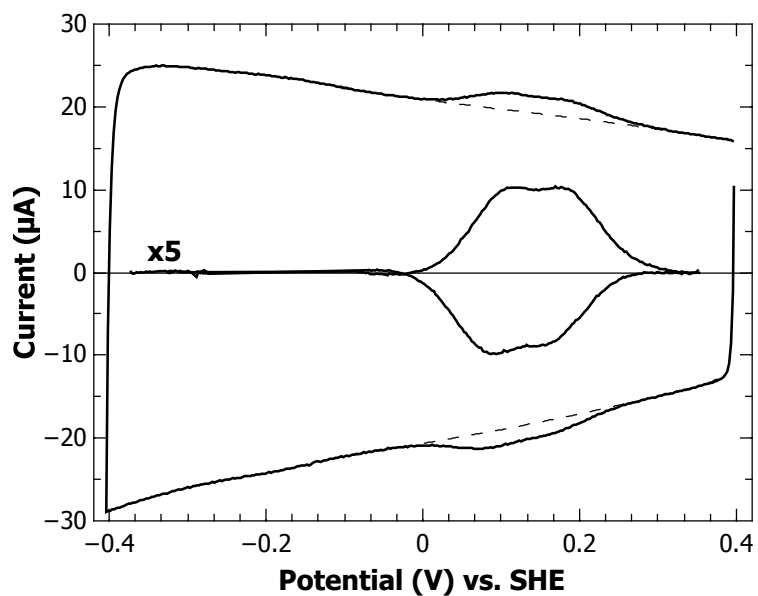

**Figure S2.** Representative cyclic voltammetry of a TsdA protein adsorbed on IO-ITO. Voltammogram (continuous line) is for *Cj*TsdA C138M in 50 mM HEPES, 50 mM NaCl, pH 7, 4 °C measured at  $10 \text{ mV s}^{-1}$ . Inset: the protein (Faradaic) response obtained by subtraction of a baseline (dashed line) from the measured current.

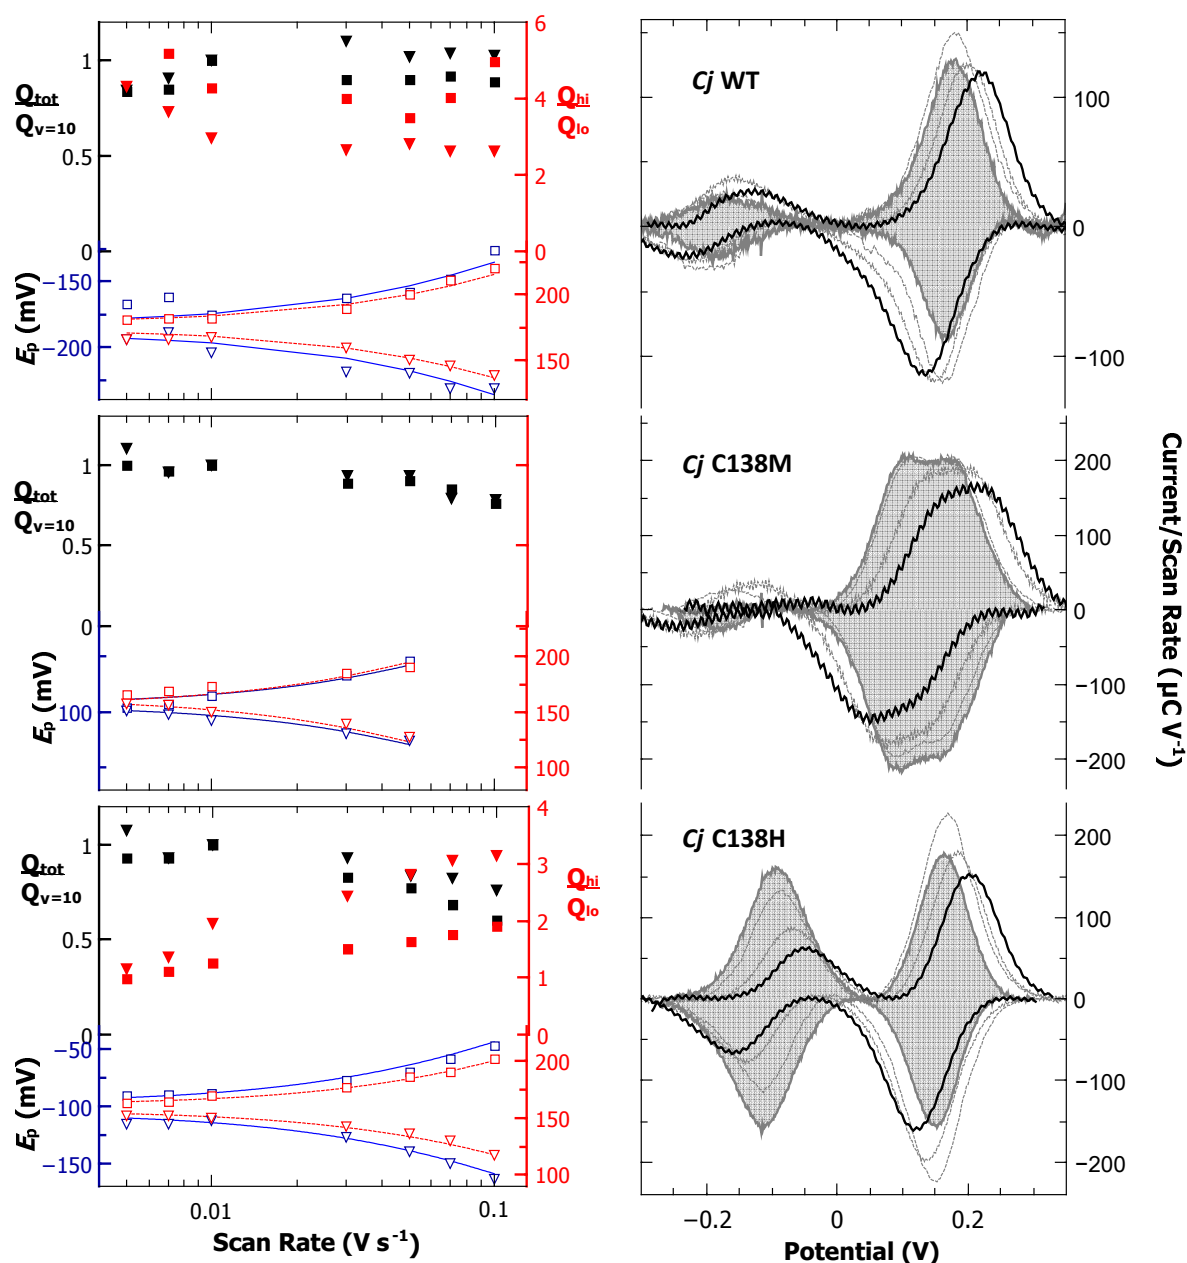

**Figure S3.** Scan-rate dependence of the cyclic voltammetry for *Cj*TsdA and Heme 1 variants adsorbed on IO-ITO electrodes.

**(Right)** Representative baseline subtracted cyclic voltammograms for the indicated proteins recorded at 5 (grey line, shaded area), 10, 50 and 100 (black line)  $\text{mV s}^{-1}$ . Data recorded in 50 mM HEPES, 50 mM NaCl, pH 7 at 4 °C.

**(Left)** Scan rate dependence of voltammetric features.

Upper part of panels. Black: total moles of electrons ( $Q_{tot}$ ) giving rise to the oxidative (circles) and reductive (triangles) peaks normalized to those at 10  $\text{mV s}^{-1}$  (black). Red: ratio of mol. electrons in the low potential peak ( $Q_{hi}$ ) to mol. electrons in the high potential peak ( $Q_{lo}$ ) for oxidative (circles) and reductive (triangles) peaks.

Lower part of panels. Red: peak potentials ( $E_p$ ) for oxidative (circles) and reductive (triangles) peaks at low (blue) and high (red) potential. Heterogeneous rate constants ( $k_o / \text{s}^{-1}$ ) were obtained from fits to the data using Jellyfit v2.1 available from (<https://www.fbs.leeds.ac.uk/jeukengroup/freeware/Jellyfit.php>).  $k_o$  values used for low/high  $E_m$  peaks were 1.06/1.48  $\text{s}^{-1}$  (*Cj* WT), 0.78/0.67  $\text{s}^{-1}$  (*Cj* C138M) and

0.87/1.38 s<sup>-1</sup> (*Cj* C138H).  $E_m$  was equal to the average of the corresponding  $E_p$  values. Examples of similar analyses can be found in Jeuken, L.J.C., McEvoy, J.P. & Armstrong, F.A. (2002) *J. Phys. Chem. B* 106 2304-2313.

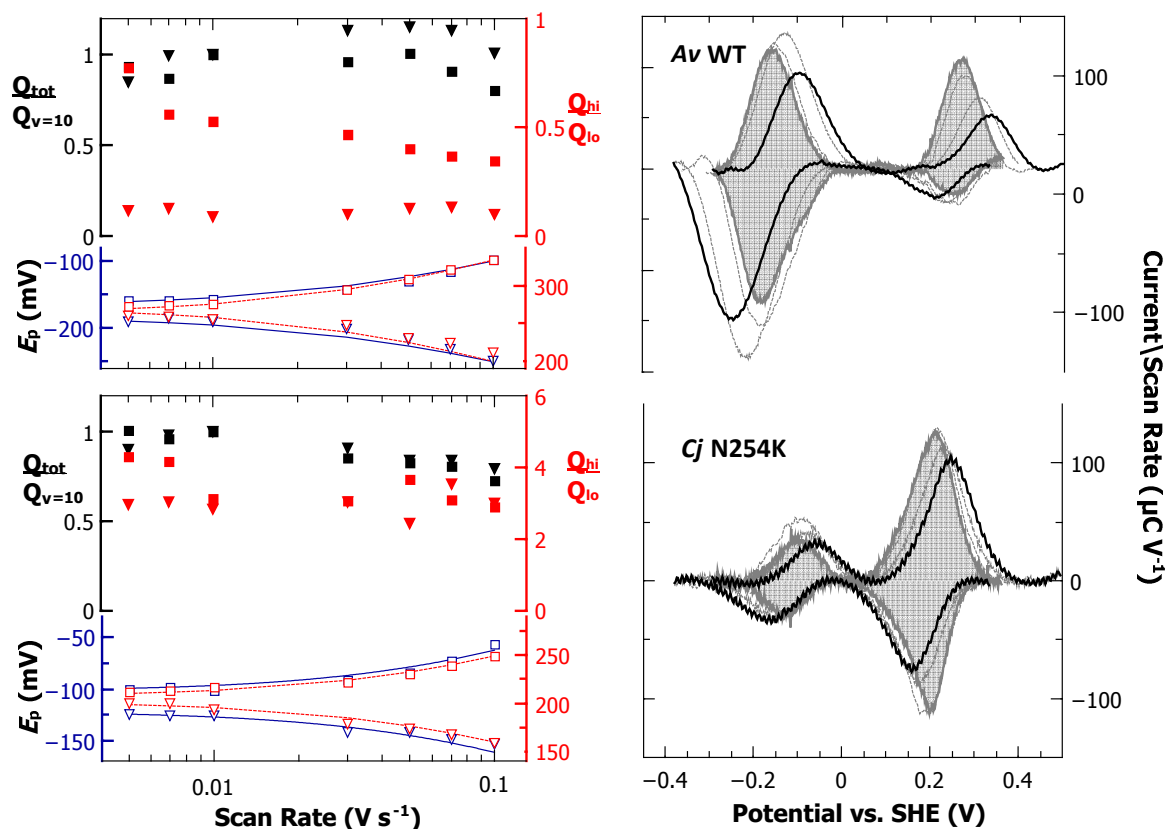

**Figure S4.** Scan-rate dependence of cyclic voltammetry for AvTsdA and CjTsdA N254K adsorbed on IO-ITO electrodes.

**(Right)** Representative baseline subtracted cyclic voltammograms for the indicated proteins recorded at 5 (grey line, shaded area), 10, 50 and 100 (black line)  $\text{mV s}^{-1}$ . Data recorded in 50 mM HEPES, 50 mM NaCl, pH 7 at 4 °C.

**(Left)** Scan rate dependence of voltammetric features.

Upper part of panels. Black: total moles of electrons ( $Q_{\text{tot}}$ ) giving rise to the oxidative (circles) and reductive (triangles) peaks normalized to those  $10 \text{ mV s}^{-1}$  (black). Red: ratio of mol. electrons in the high potential peak ( $Q_{\text{hi}}$ ) to mol. electrons in the low potential peak ( $Q_{\text{lo}}$ ) for oxidative (circles) and reductive (triangles) peaks.

Lower part of panels. Red: peak potentials ( $E_p$ ) for oxidative (circles) and reductive (triangles) peaks at low (blue) and high (red) potential. Heterogeneous rate constants ( $k_0 / \text{s}^{-1}$ ) were obtained from fits to the data using Jellyfit v2.1 available from (<https://www.fbs.leeds.ac.uk/jeukengroup/freeware/Jellyfit.php>).  $k_0$  values used for low/high  $E_m$  peaks were  $0.67/0.72 \text{ s}^{-1}$  (Av WT) and  $1.32/1.22 \text{ s}^{-1}$  (Cj N254K).  $E_m$  was equal to the average of the corresponding  $E_p$  values. Examples of similar analyses can be found in Jeuken, L.J.C., McEvoy, J.P. & Armstrong, F.A. (2002) J. Phys. Chem. B 106 2304-2313.

**Table S1.** Peak wavelengths ( $\lambda$ ) and intensities ( $\Delta\epsilon$ ) for low-spin Fe(III) charge-transfer transitions in nIR MCD. ox = oxidized form, asc = ascorbate reduced form.

| $\lambda$ / nm<br>( $\Delta\epsilon$ / $M^{-1} cm^{-1} T^{-1}$ ) |     | Heme 1               |                |                             | Heme 2            |                             |
|------------------------------------------------------------------|-----|----------------------|----------------|-----------------------------|-------------------|-----------------------------|
|                                                                  |     | His/Cys <sup>-</sup> | His/His        | His/Met                     | His/Lys           | His/Met                     |
| AvTsdA<br>(407/208)*                                             | ox  |                      |                |                             | 1505 (1.6)        |                             |
|                                                                  | asc | 1240<br>(0.42)       |                |                             |                   |                             |
| CjTsdA<br>(415/190)                                              | ox  | 1215                 |                |                             |                   | 1825<br>(0.74)              |
|                                                                  | asc | 1225<br>(0.50)       |                |                             |                   |                             |
| CjTsdA C138M<br>(413/210)                                        | ox  |                      |                | 1735 <sup>†</sup><br>(0.51) |                   | 1825 <sup>‡</sup><br>(0.74) |
|                                                                  | asc |                      |                |                             |                   |                             |
| CjTsdA C138H<br>(411/230)                                        | ox  |                      | 1480           |                             |                   | 1820<br>(0.82)              |
|                                                                  | asc |                      | 1480<br>(1.03) |                             |                   |                             |
| CjTsdA N254K<br>(408/200)                                        | ox  | 1250                 |                |                             | 1525 nm<br>(0.75) | 1825<br>(0.47)              |
|                                                                  | asc | 1250<br>(0.41)       |                |                             |                   |                             |

\* The Soret absorption peak wavelength and extinction coefficients ( $nm/mM^{-1}cm^{-1}$ ) are shown in brackets for each species.

<sup>†</sup> by subtraction.

<sup>‡</sup> assumed to be the same as CjTsdA.

**Table S2.**  $E_m$  values derived from modelling of voltammograms, see Methods for details.

|              | Heme 1               |         | Heme 2  |         |                 |
|--------------|----------------------|---------|---------|---------|-----------------|
|              |                      |         |         |         |                 |
| AvTsdA       | His/Cys <sup>-</sup> | -181 mV | His/Lys | -129 mV | His/Met +266 mV |
| CjTsdA       | His/Cys <sup>-</sup> | -186 mV |         |         | His/Met +172 mV |
| CjTsdA C138M | His/Met              | +94 mV  |         |         | His/Met +174 mV |
| CjTsdA C138H | His/His              | -100 mV |         |         | His/Met +160 mV |
| CjTsdA N254K | His/Cys <sup>-</sup> | -115 mV | His/Lys | -171 mV | His/Met +203 mV |

**Table S3.** Moles of electrons transferred ( $Q$ ) in the baseline-subtracted and modelled peak areas for cyclic voltammetry of adsorbed TsdA proteins. Bolded values ( $\pm \sigma$ ) are average of three scans performed at  $10 mV s^{-1}$  in 50 mM HEPES, 50 mM NaCl, pH 7, 4 °C with the exception of CjTsdA

N254K scan 1. Italicized values are for the modelled contributions shown in Fig 5 and 8 with grey values assigned to Heme 1 and blue values assigned to Heme 2. Ox = oxidized, red = reduced, lo = low potential, hi = high potential.

| Enzyme                            | Low Potential Peak<br>(mol $e^-$ )                 |                                                    | High Potential Peak<br>(pmol $e^-$ )                |                                                     | Total<br>(pmol $e^-$ )                         |                                                |
|-----------------------------------|----------------------------------------------------|----------------------------------------------------|-----------------------------------------------------|-----------------------------------------------------|------------------------------------------------|------------------------------------------------|
|                                   | $Q_{lo}^{ox}$                                      | $Q_{lo}^{red}$                                     | $Q_{hi}^{ox}$                                       | $Q_{hi}^{red}$                                      | $Q_{tot}^{ox}$                                 | $Q_{tot}^{red}$                                |
| <b><i>CjTsdA</i></b>              | <b>41 (<math>\pm 10</math>)</b><br><i>31</i>       | <b>52 (<math>\pm 10</math>)</b><br><i>41</i>       | <b>166 (<math>\pm 10</math>)</b><br><i>145</i>      | <b>135 (<math>\pm 21</math>)</b><br><i>124</i>      | <b>207 (<math>\pm 10</math>)</b><br><i>176</i> | <b>187 (<math>\pm 21</math>)</b><br><i>165</i> |
| <b><i>AvTsdA</i></b>              | <b>176 (<math>\pm 10</math>)</b><br><i>114, 31</i> | <b>269 (<math>\pm 21</math>)</b><br><i>135, 83</i> | <b>93 (<math>\pm 10</math>)</b><br><i>93</i>        | <b>21 (<math>\pm 10</math>)</b><br><i>31</i>        | <b>269 (<math>\pm 10</math>)</b><br><i>238</i> | <b>300 (<math>\pm 21</math>)</b><br><i>249</i> |
| <b><i>CjTsdA C138M</i></b>        |                                                    |                                                    | <b>373 (<math>\pm 21</math>)</b><br><i>176, 176</i> | <b>352 (<math>\pm 10</math>)</b><br><i>166, 145</i> | <b>373 (<math>\pm 21</math>)</b><br><i>352</i> | <b>352 (<math>\pm 10</math>)</b><br><i>311</i> |
| <b><i>CjTsdA C138H</i></b>        | <b>155 (<math>\pm 10</math>)</b><br><i>135</i>     | <b>124 (<math>\pm 10</math>)</b><br><i>104</i>     | <b>207 (<math>\pm 10</math>)</b><br><i>218</i>      | <b>238 (<math>\pm 21</math>)</b><br><i>218</i>      | <b>373 (<math>\pm 10</math>)</b><br><i>353</i> | <b>352 (<math>\pm 21</math>)</b><br><i>322</i> |
| <b><i>CjTsdA N254K scan 1</i></b> | <b>52</b><br><i>21, 41</i>                         | <b>145</b><br><i>62, 73</i>                        | <b>165</b><br><i>124</i>                            | <b>83</b><br><i>52</i>                              | <b>218</b><br><i>187</i>                       | <b>228</b><br><i>187</i>                       |
| <b>steady-state</b>               | <b>52 (<math>\pm 10</math>)</b><br><i>52</i>       | <b>31 (<math>\pm 10</math>)</b><br><i>41</i>       | <b>155 (<math>\pm 10</math>)</b><br><i>124</i>      | <b>135 (<math>\pm 21</math>)</b><br><i>104</i>      | <b>207 (<math>\pm 10</math>)</b><br><i>176</i> | <b>166 (<math>\pm 10</math>)</b><br><i>145</i> |
